# Supplementary material for: Efficacy and Safety of Recombinant Activated Factor VII for Acute Intracerebral Hemorrhage
Source: Atypon-hosted journal article supplement (doi:10.1056/nejmoa0707534), 2008-05-14
Supplement: nejm_mayer_2127sa1.pdf [file nejm_mayer_2127sa1.pdf]

## Supplementary Appendix

This appendix has been provided by the authors to give readers additional information about their work.

Supplement to: Mayer SA, Brun NC, Begtrup K, et al. Efficacy and safety of recombinant activated factor VII for acute intracerebral hemorrhage. *N Engl J Med* 2008;358:2127-37.

## Supplementary Appendix

### FASTTrial Clinical Centers with No Patients

V. Aiyagari, University of Illinois, Chicago; I. Altafullah, North Memorial Medical Center, Golden Valley, MN; R. Atkinson, Sutter Medical Center, Sacramento, CA; M. Baskaya, University of Wisconsin Hospital and Clinics, Madison; S. Cramer, University of California, Orange; L. DaSilva, Tallahassee Memorial HealthCare, Tallahassee, FL; L. Dennis, Hackensack University Medical Center, Hackensack, NJ; C. Gomez, Brookwood Medical Center, Birmingham, AL; W. Hanigan, OSF Saint Francis Medical Center, Peoria, IL; J. Hillburn, Indiana Neuroscience Institute, Indianapolis; D. Huang, University of North Carolina Stroke Center, Chapel Hill; R. Hughes, University of Colorado, Denver; B. Indredavik, St. Olavs Hospital, Trondheim, Norway; D. Inzitari, Azienda Ospedaliera Universitaria Careggi, Florence, Italy; H. Iversen, Klingenberg Glostrup Amtssygehus, Glostrup, Denmark; M. Johnson, University of Texas Southwestern Medical Center, Dallas; M. Kaminski, Saint Thomas Hospital, Nashville; V. Kwa, Ing Han Slotervaart Ziekenhuis, Amsterdam; V. Larrue, Centre Hospitalier Universitaire Rangueil, Toulouse, France; T. Lowenkopf, Oregon Health and Science University, Portland; F. Masuhr, Charité–Universitätsmedizin Berlin, Berlin; P. Nyquist, Johns Hopkins University, Baltimore; A. Peeters, Cliniques Universitaires Saint-Luc, Brussels; P. Rasmussen, Cleveland Clinic Foundation, Cleveland; D. Ratanakorn, Ramathibodi Hospital, Bangkok, Thailand; S. Roaloe, Sentralsykehus i Rogaland, Stavanger, Norway; O. Samuels, Emory University Hospital, Atlanta; M. Selim, Beth Israel Deaconess Medical Center, Boston; J. Schim, The Neurology Center, Oceanside, CA; M. Sloan, Carolinas Medical Center, Charlotte, NC; S. Starkman, University of California, Los Angeles, Stroke Network, Los Angeles; J. Sturm, Gosford and Wyong Hospitals, Gosford, Australia; D. Tirschwell, University of Washington, Seattle; A. Vaishnav, University of Kentucky, Lexington; L. Thomassen, Haukeland Sykehus, Bergen, Norway; J. Wilberger, Allegheny Hospital, Pittsburgh; L.K.S. Wong, Prince of Wales Hospital, Hong Kong.
